# Supplementary material
Source: publisher site journal article supplement (https://static.cambridge.org/content/id/urn:cambridge.org:id:article:S0962728600010897/resource/name/Dubois_AppendixA.pdf)
Supplement: Supplementary file 1 [file Dubois_AppendixA.pdf]

## Appendix A - Owner Self-Assessment

### PART A – INDOOR ENVIRONMENT

1. Is there a barn on the property? If yes, continue. If no, skip this section.

YES

NO

2. Are the entrances to the barn wide enough for a human and a horse to pass through safely?

YES

NO

N/A

3. Is the ceiling high enough such that horses do not hit their heads when standing quietly?

YES

NO

N/A

4. Is the barn lit by windows or some form of artificial lighting?

YES

NO

N/A

5. Are aisleways wide enough for a human and a human and a horse to pass through safely?

YES

NO

N/A

6. Are stalls large enough for the horse (or horses) occupying them to lie down without getting cast?

YES

NO

N/A

7. Are stalls bedded deeply enough to avoid causing injury to the horses stalled in them?

YES

NO

N/A

8. Are stalls cleaned regularly?

YES

NO

N/A

9. Do horses have access to fresh, clean water while inside?

YES

NO

N/A

10. Do you rarely smell ammonia in your barn?

YES

NO

N/A

**Indicate any areas or management practices you believe may be responsible for compromised well-being for your animals in this indoor environment:**

**PART B – OUTDOOR ENVIRONMENT**

1. Are horses turned out at some point during the day or night? If no skip section.

YES

NO

N/A

2. Are horses turned out in groups OR in a paddock where they can see other horses?

YES

NO

N/A

3. Are the fences used on the property appropriate for horses?

YES

NO

N/A

4. Are paddock gates wide enough to safely allow a human and a horse to pass through?

YES

NO

N/A

5. Do horses have a mud-free area in their turnout area?

YES

NO

N/A

6. Do horses have access to fresh, clean water?

YES

NO

N/A

7. Do all paddocks have a shelter, either man-made or a line of mature trees?

YES

NO

N/A

**Indicate any areas or management practices you believe may be responsible for compromised well-being for your animals in the outdoor environment:**

**PART C – SAFETY**

1. Is the farming equipment (e.g. tractor) stored in a separate building from the main barn?

YES

NO

N/A

2. Is there a fire extinguisher available in the barn?

YES

NO

N/A

3. Is there a list of emergency numbers readily available to staff?

YES

NO

N/A

4. Is there an emergency plan in the event of a fire or other natural disaster?

YES

NO

N/A

**Indicate any areas or management practices you believe may be responsible for compromised well-being for your animals' safety:**

#### **PART D – EQUINE HEALTH**

1. Is hard feed (grain) stored in rodent-proof (hard plastic or metal) containers OR raised off the ground on skids?

YES

NO

N/A

2. Are the majority of the horses on the property carrying good weight? (Not too fat, not too thin)

YES

NO

N/A

3. Does the farm owner have good rapport with a veterinarian?

YES

NO

N/A

4. Does the farm keep up-to-date deworming records?

YES

NO

N/A

5. Does the farm keep up to date farrier records?

YES

NO

N/A

6. Is there a hospital barn OR a place to segregate new or sick animals?

YES

NO

N/A

7. Are new arrivals segregated?

YES

NO

N/A

**Indicate any areas or management practices you believe may be responsible for compromised well-being for your animals' health:**
